# Supplementary material for: Quantifying the effect of seasonal and vertical habitat tracking on planktonic foraminifera proxies
Source: Copernicus journal article supplement (doi:10.5194/cp-2016-125), 2016-12-05
Supplement: Supplementary file [file cp-2016-125-AC2-supplement.pdf]

Dear editor, dear Luke,

Please find below our response to the comments by reviewer 2. We are grateful for the suggestion to look deeper into the uncertainty associated with the data. We have carefully taken the issue into account and believe that the updated analysis strengthens the main message of our study.

Below we respond to the comments in red. Line numbers refer to the version of the manuscript with highlighted changes (appended to our response your comment). We hope that this revised version merits publication in *Climate of the Past*.

Kind regards,

Lukas Jonkers and Michal Kucera

---

Review for *Climate of the Past* of: "Quantifying the effect of seasonal and vertical habitat tracking on planktonic foraminifera proxies". By L. Jonkers and M. Kuçera.

The oxygen isotope composition in planktonic foraminifera is considered to be primarily a function of the ambient temperature and the oxygen isotope composition of seawater ( $^{18}O_w$ ) during calcification. To a lesser extent the oxygen isotope composition of the tests ( $^{18}O_{\text{foram}}$ ) may change as a function of other environmental factors related to the (carbonate) chemistry of the seawater or biological controls. Previous studies have indicated that the production of planktonic foraminifera is not distributed uniform over the time span of a year, but that growth takes place during a season in which most suitable conditions prevail. The same holds for the calcification depth, which may vary depending on the water column conditions such as temperature, (temperature or physical) structure (e.g. stratification) or may depend on the depth of food availability. As such planktonic foraminifera may have a changing season of growth and depth, both depending on the local / regional ocean-climate conditions. The study presented by Jonkers and Kuçera deals with the goal to unravel the seasonal/depth signal recorded in the oxygen isotope composition of planktonic foraminifera. The study aims quantification of seasonal & depth habitat tracking by some species of planktonic foraminifera. Oxygen isotope measurements from core top sediments, are used in this study to obtain insight in the habitat tracking of foraminifera.

The manuscript generally reads well, is sufficiently illustrated and referenced. Unfortunately, the data used / presented seriously lack estimates of variability and appropriate statistical testing. At this stage it is unclear if the same conclusion will be reached after more careful consideration of the error and variability of the data used. It is recommended to include an analysis of variability and error and investigate the

consequences of this for the significance of the regressed slopes used on which the main conclusion is based. As such the manuscript in its present form is suitable for publication after revisions.

#### Comments and suggestions

In general readability / clarity can be improved by associating  $18\text{O}$  or  $18\text{O}$  with the appropriate subscript i.e. indicating water(w), foram (f) or equilibrium(eq), foram minus water (f-w) or foram minus equilibrium ( $18\text{O}_{\text{foram-eq}}$ ) etc. At times this is unclear or even lacking, and therefore confusing and obstructing smooth reading.

**We will make sure to add appropriate subscripts to enhance clarity.**

In the first part of the study, the authors have investigated whether there is a trend between the  $18\text{O}_{\text{foram}} - 18\text{O}_{\text{eq.am.0-50m}}$  - briefly referred to as  $18\text{O}$  – and the mean annual temperature (MAT). If there is a trend, it can be concluded that species have recorded temperatures systematically deviating from the MAT. The analysis shown is key to the conclusion of the study, and it because of this importance and further implications for the study that more transparency is needed in showing these data, in combination with a more appropriate and sound statistical assessment.

**This is a perfectly accurate description of the starting point of our study. This seemed so obvious to us that we have omitted this step in the figures and started by analysing the residual structure. We understand the merit of providing a more basal evaluation of the original data (including uncertainties, see below) and propose to include these in the supplement.**

Looking at the data represented in Figure 2, it is not clear what the original ( $18\text{O}_{\text{foram}}$  and  $18\text{O}_{\text{equilibrium}}$ ) data are alike. The reason for this is that - in Figure 2 – only the difference between the foraminiferal  $18\text{O}_{\text{f}}$  and the equilibrium value is graphically provided. I would say this showing the ("raw") data used for a study like this would be the first thing to do. Why I think this is important? It is so because it can be expected that the equilibrium value changes as a function of upper ocean temperature and  $18\text{O}_{\text{w}}$  and error associated with the data can be made visible (see below). As such, it is recommended to insert a new figure - between the present Figure 1 and 2 - showing the foraminiferal  $18\text{O}$  measurements and their associated equilibrium values including estimates of error / variability in the form of error bars (e.g. s.d. or c.i. intervals)!!

**Next to providing the figure of the raw data, we have followed the suggestion of the referee and attempted to estimate the uncertainties in the various  $d18\text{O}$  values. To this end, we consider the following main sources of uncertainty:**

- **Uncertainty on the observed  $d18\text{O}_{\text{calcite}}$  values based on the standard deviation of repeat measurements in the MARGO dataset. This amounts to 0.12 ‰.**
- **A calibration uncertainty with respect to predicted  $d18\text{O}$ . We use 0.2 ‰ based on previous work.**

- Uncertainty associated with the predicted  $d_{18O_{eq}}$ , which in our opinion is mainly driven by uncertainty in the estimation of  $d_{18O_{sw}}$  from salinity. This uncertainty varies regionally and is largest in the Arctic, where it reaches 0.91 ‰.

We propagate these uncertainties using a Monte Carlo approach; details are described in section 2: Data and approach (lines 177-182). Uncertainty on the mean annual temperature and salinity values is not taken into account because these are based on many observations, rendering the error negligible. Since at this place of the argument our zero hypothesis is that foraminifera record annual mean conditions (not any month or season within a year), we can ignore the uncertainty associated with intra-annual temperature and salinity variability.

The resulting uncertainty estimates support our original conclusion that five out of six of the species do not record mean annual conditions in the upper water column (Sup Fig. 1). Since the new figure and our original figure 2 are partly redundant, we chose to include the new figure in the supplementary information.

The data discussed and graphically represented in Figure 2 presently lack estimates of variability, that is, the data shown are not associated with an estimate of variability resulting from (measurement) error, environmental (i.e. seasonal) temperature variability (MAT is used, but the degree to which MAT is known varies as a function of seasonality), and variability resulting from the  $18O_{sw}$  estimates (expected to be relatively high at high latitudes and used to calculate the  $18O_{eq,am.0-50m}$  for which regressions vs. salinity - with error - have been used (LeGrande and Schmidt (2006). It is only later in the manuscript the authors refer to this as "some inherent noise" (line 206) indicating that the authors are aware their data should be associated with s.d. or alternatively with a confidence intervals to properly assess the information. The point here I want to make is that I disagree with the statement that this would be "...some inherent noise...". There is unfortunately, no effort or attempt made to provide any form of error / variability assessment, while in my view there's plenty of opportunity to do so (SST variability is known since atlas data were used, error in  $18O_{sw}$  can be assessed via the regressions used etc. etc.). The assessment of the variability is key to the conclusion that (line 143): "...five out six analyzed species appear to minimise experienced temperature / environmental change, consistent with our hypothesis that....". Just reporting the RMSE and intercept of the regression is not sufficient to support the hypothesis that several species show evidence of habitat tracking. The authors should make a serious effort to come up with a decent quantification of error and convincingly show that the conclusion drawn from the data is statistically sound and robust! Once "x y" variability is assessed, an appropriate statistical test can be used to find out whether the slopes shown in Figure 2 are indeed significantly different from 'zero.

The referee is right to demand such analysis. Please also see our response above. We have followed this approach to estimate the error of the  $Dd_{18O}$ -MAT relationships (Fig. 2). The error envelopes show the 5 to 95 percentiles of the Monte Carlo analysis and confirm our original conclusion that there is a

relationship between MAT and the offset from annual mean d18O in the upper water column in 5 out of 6 species, which is consistent with the expected effect of habitat tracking.

In section 4 "seasonality", the log (flux) pattern is described as "...a sine wave of which the amplitude and phasing are changed as a function of the annual mean temperature...". Although this may - intuitively - be a reasonable approximation for the extratropics, I wonder if the approach followed also agrees with the flux patterns for species living in the tropical oceans where insolation is not a limiting factor and there is two maxima in the solar insolation during the course of a year. It seems that the authors do observe a problem with this model in predicting the seasonal flux pattern of species in the tropics (lines 154- 157), but it is not explained / clarified why this is so and what the implication would be for their conclusion! Likely the seasonality of species in the tropics is driven by other factors than temperature? Maybe this can be clarified better in the context of Lombard et al., (2009) (*Mar.Mic*, 70, 1-7) and Lombard et al., (2011) (*Biogeosciences*, 8, 853-873), where species growth rates are modelled as a function of temperature. If using an ocean model in combination with temperature dependent growth rates i.e. using an ecophysiological model, one can likely predict the oxygen isotope composition reasonably well. I wonder why such an approach, i.e. using an eco-physiological model, has not been chosen and preference is given to modelling the flux as "a function of a shifted the sine wave"? This should be clarified.

The primary goal of our submission was to show that habitat tracking influences fossil signal and by how much – to the best of our knowledge this has not been demonstrated in this way before - and to raise awareness in the paleoceanographic community that the issues should be taken into account. Once showing that the sedimentary isotopic signal bears a signature of habitat tracking, we face the inherently more difficult question of the exact attribution of the habitat tracking to depth and season. In this study, we addressed the problem by constraining seasonality through observations. This is in our opinion the best approach because there are much better data on seasonality than on depth habitat. To this end, we adopted a sine wave model of flux seasonality based on previous work where we showed that foraminifera flux patterns can be described using a simple sine wave and that modulation of this sine wave (amplitude and phasing) can be predicted by temperature (Jonkers and Kučera, 2015). While we agree with the reviewer that other (temperature-related) factors are likely to be important too and that different approaches exist to model foraminifera seasonality (Lombard et al., 2011; Fraile et al., 2008), we decided to stick to a formulation that is entirely based on empirical observations. This is acknowledged in the manuscript on lines 237-238 Please also refer to our response to a similar comment by reviewer 1 for a motivation of our model choice.

As mentioned in the original text (lines 229-231), the inability of our model to capture the random flux peak timing in the tropics is of negligible consequence for the sedimentary signal because in the tropics both shell fluxes (low amplitude, or peak prominence as described in Jonkers and Kucera (2015)) and SST are relatively constant during the year.

Similarly to the remarks above for Figure 2 and associated data, data shown in Figure 5 data should have variability indication. A test of slope should be performed to show the slope is not significantly different from "zero", further supporting the hypothesis that depth habitat migration may indeed occur.

We understand this point, but note that this can only be addressed indirectly. This is because in the moment we included the modelled seasonal effect on the  $d_{18O}$ , we have added a source of uncertainty that is hard to constrain. The residual  $Dd_{18O}$  after seasonal weighting of the  $d_{18O_{eq}}$  is model dependent and the model has parameters with unconstrained uncertainty (in fact the formulation of the model itself – using a sine wave is not certain). This is why we can only proceed with the analyses as shown in figure 5, "given" the particular model formulation. This means that effectively we ask the question 'is the residual  $Dd_{18O}$  after seasonality correction depth dependent when we use this particular seasonality model?'. However, we feel we owe the readers at least a first order estimate of the sensitivity of the result on the parameters of the sine-wave model we use. . We have therefore explored how sensitive the apparent calcification depth (ACD)-temperature relationship is to the slope and intercept of the MAT-flux amplitude relationship.

We show the results for *G. ruber pink* (Sup fig.2), obtained by doubling and halving the slope and intercept of the MAT-flux relationship with respect to the empirical values obtained from (Jonkers and Kučera, 2015). Increasing the seasonality reduces the RMSE and the dependency of  $Dd_{18O}$  on MAT in the seasonally weighted  $Dd_{18O}$  estimates. It yields estimates of ACD that appear not or positively correlated with MAT and leads to (seasonality and depth weighted  $Dd_{18O}$ ) RMSE and  $Dd_{18O}$ -MAT slopes similar to the observation-based model.

The reverse holds true for a reduction in seasonality, which yields RMSE larger and  $Dd_{18O}$ -MAT slopes steeper than when using mean annual values and implies  $Dd_{18O}$ -MAT relationships similar to our original seasonality-only  $Dd_{18O}$  estimates and RMSE close to the  $Dd_{18O}$  based on annual mean values.

This suggests that the formulation of seasonality in our model is conservative: weaker seasonality parametrisation leaves much larger residuals and a slope that cannot be accounted for by depth habitat adjustment. However, we note that in the case of *G. ruber pink* there exists a parametrisation of flux seasonality that leads to a greater improvement in the  $d_{18O}$  prediction and implies a constant habitat depth adjustment.

We will add the discussion above to the section 'seasonality vs. depth habitat'.

The following minor comments have all been addressed/changed. We have provided a response only in cases where we don't agree with the reviewer or feel that more explanation is needed.

line 63: Should read: "...a clear relationship with sea surface temperature .."

line 64: Sentence unclear, consider rephrasing: "While the latter trend....will reflect".

line 75: Vertical habitat? Recommended to change to "depth habitat".

line 79: Geochemical data: mention Mg/Ca, 18Oforam.

Line 81: Start new paragraph

line 90: Seasonal sea surface temperature instead of seasonal temperature. **Not strictly sea surface, so we prefer not to change the wording here.**

line 97: dampening effect: i.e. reduction of the recorded range versus the environmental (observed) range.

Line 100: "foraminifera proxies". Better: "foraminiferal 18O" **We prefer to keep the original general wording since to our knowledge no other study has looked into this effect.**

line 133: Incomplete. Change "..high temperatures..." into "..high annual mean temperatures..".

line 133: Change "...higher calcification temperatures..." into "...higher than annual mean calcification temperatures...".

line 137: "...Nordic Seas outside of the direct...". Remove "of".

Line 136-139: "These observations...further analysis". This sentence is quite long. Consider making two. Second sentence may start after North Atlantic Drift.

line 140-141: "...is the only species that..." can be removed. **We would like to point out that G. bulloides is in our analysis the exception and hence prefer to keep the original.**

line 143: "...analysed species.." may be changed into "...species analysed...".

line 163: "all of" can be removed

line 202: "Our analysis allows partitioning of habitat change in to changes in seasonality and calcification depth for ....." . If statistically robust, and the same conclusion holds after analysis of variability, the analysis still does not allow (a full) partitioning in my opinion. I recommend to phrase more careful.

line 204: use 18Oforam instead of just 18O. Note that the delta notation has been used in two forms. Indicate which one is applicable.

line 244-252: The effect of an nutrient depleted mixed layer quite typical for the tropical ocean structure is not considered as an option for deeper & colder growth. Simply the fact that species can find their food deeper in the water column (Deep Chlorophyl Maximum), just because the mixed layer is nutrient poor and as such contains less particulate matter, is not considered here. It would offer a very plausible explanation for deeper growth - at lower than SST - in the tropics.

line 261: "...foraminifera grow their test exponentially..." needs rephrasing. i.e. " ...shell mass increases exponentially as a function of shell size... "

line 303: The remark that the species 18O "at face value" holds the best promise of providing reconstructions of mean annual near surface conditions is may be a bit mystifying. As is explained in the next section, G. bulloides is characteristic for high nutrient waters and in (tropical) upwelling systems the species is associated with upwelling and hence calcifying at or close to the lowest SST's during the year. Since the SST's during upwelling are deviating from AM conditions, it may be better to say that right away that G. bulloides does not reflect AM conditions.

line 314: "assumption of constant seasonality and depth habitat" references? or leave out...

As explained in our response to reviewer 1 we prefer to give a positive example instead..

line 322: Rephrasing needed: "..not driven by mean annual temperature..". How can a mean temperature drive anything?? The mean is a statistic!

line 379: homeostatic behaviour? I'm quite sure that the term 'homeostasis' is applicable to humans/warm blooded animals. I guess there is not such a regulatory system present in uni-cellular zoo-planktic algae! I guess the ability of foraminifera to potentially "actively" seek optimal conditions may more have to do with their genetic and epigenetic (not investigated so far) profiles.

Please provide more informative Figure captions these are very brief!

Fraile, I., Schulz, M., Mulitza, S., and Kucera, M.: Predicting the global distribution of planktonic foraminifera using a dynamic ecosystem model, *Biogeosciences*, 5, 891-911, 10.5194/bg-5-891-2008, 2008.

Jonkers, L., and Kučera, M.: Global analysis of seasonality in the shell flux of extant planktonic Foraminifera, *Biogeosciences*, 12, 2207-2226, 10.5194/bg-12-2207-2015, 2015.

Lombard, F., Labeyrie, L., Michel, E., Bopp, L., Cortijo, E., Retailleau, S., Howa, H., and Jorissen, F.: Modelling planktic foraminifer growth and distribution using an ecophysiological multi-species approach, *Biogeosciences*, 8, 853-873, 10.5194/bg-8-853-2011, 2011.
